# Supplementary material
Source: PubMed Central journal article supplement (PMC3328801)
Supplement: NIHMS232508-supplement-supplement_1.pdf [file NIHMS232508-supplement-supplement_1.pdf]

1  
2  
3  
4  
5  
6  
7 **Appendix A. Supplementary data**  
8  
9

10  
11 **S1. Supplemental Materials and Methods**  
12

13  
14 **S1.1. Reagents**  
15

16  
17 Lipopolysaccharide (LPS) from *Escherichia coli* 0111:B4 was purchased from Sigma.  
18

19  
20 Polyclonal antibodies to HM74 was from Novus Biologicals; monoclonal antibodies to  $\beta$ -actin  
21  
22 were from Santa Cruz Biotechnology, HRP-conjugated anti-goat, anti-rabbit, were from  
23  
24 Amersham.  
25  
26  
27

28  
29  
30 **S1.2. Animal studies**  
31

32  
33 All animal procedures were conducted in accordance with applicable regulation on animal  
34  
35 experimentation and welfare. These procedures were approved by the University of Pennsylvania  
36  
37 Institutional Animal Care and Use Committee. Six- to eight-week-old female C57BL/6J mice  
38  
39 were obtained from the Jackson Laboratory or and maintained on a chow diet. Mice received an  
40  
41 intraperitoneal (IP) injection of a dose of 625  $\mu$ g/kg LPS in PBS. At various time intervals, mice  
42  
43 were anesthetized or euthanized by IP administration of ketamine/xylazine, then bled  
44  
45 retroorbitally. For extraction of tissues, the heart was perfused with ice-cold PBS and organs  
46  
47 excised and stored in RNAlater solution (Ambion) at 4°C.  
48  
49  
50  
51  
52  
53  
54  
55  
56

57  
58 **S1.3. RNA isolation and gene expression analysis**  
59  
60  
61  
62  
63  
64  
65

1  
2  
3  
4  
5  
6  
7  
8  
9  
10  
11  
12  
13  
14  
15  
16  
17  
18  
19  
20  
21  
22  
23  
24  
25  
26  
27  
28  
29  
30  
31  
32  
33  
34  
35  
36  
37  
38  
39  
40  
41  
42  
43  
44  
45  
46  
47  
48  
49  
50  
51  
52  
53  
54  
55  
56  
57  
58  
59  
60  
61  
62  
63  
64  
65

Total RNA was isolated using EZ1 RNA Mini Kit (QIAGEN) according to the manufacturer's instructions. One  $\mu\text{g}$  of total RNA was reverse transcribed using the High Capacity cDNA Reverse Transcription Kit (ABI). Real-time quantitative PCR was performed on an Applied Biosystems 7300 sequence detector. Primer and probe sequences are available on request.

1  
2  
3  
4  
5 **Supplemental Figure Legends:**  
6

7  
8 **Supplemental Figure.** GPR109A expression in mouse liver stimulated by LPS *in vivo* and *ex*  
9 *vivo*. Mice received an IP injection of a dose of 625 µg/kg LPS in PBS. (A) Time course for  
10 changes in mouse liver GPR109A expression following LPS stimulation. Liver GPR109A  
11 mRNA was measured by quantitative real time PCR (QRT-PCR). Data are expressed as mean ±  
12 SEM, *n*=4 for each time point. \*\*\**P* <0.01. (B) Western blotting demonstrating the substantial  
13 increase expression of GPR109A protein in liver response to LPS. Representative blot for 3  
14 separate experiments. (C) LPS increases hepatocyte GPR109A expression *in vivo*. Mouse  
15 hepatocytes and liver tissue were isolated at 0 and 2 hours after *in vivo* LPS injection, followed  
16 immediately by total RNA preparation for GPR109A mRNA analysis by QRT-PCR. Data are  
17 expressed as mean ± SEM, *n*=3, \*\*\**P*<0.001. (D) Time course of GPR109A expression in  
18 primary murine hepatocytes after LPS treatment. Hepatocytes were treated with 100 ng/ml LPS  
19 for different times, and GPR109A mRNA was measured by quantitative PCR. Data are  
20 expressed as mean ± SEM, *n*=3, \*\*\**P* < 0.01, \**P* <0.05.  
21  
22  
23  
24  
25  
26  
27  
28  
29  
30  
31  
32  
33  
34  
35  
36  
37  
38  
39  
40  
41  
42  
43  
44  
45  
46  
47  
48  
49  
50  
51  
52  
53  
54  
55  
56  
57  
58  
59  
60  
61  
62  
63  
64  
65
