# Supplementary material
Source: PubMed Central journal article supplement (PMC3328801)

Supplemental Figure.

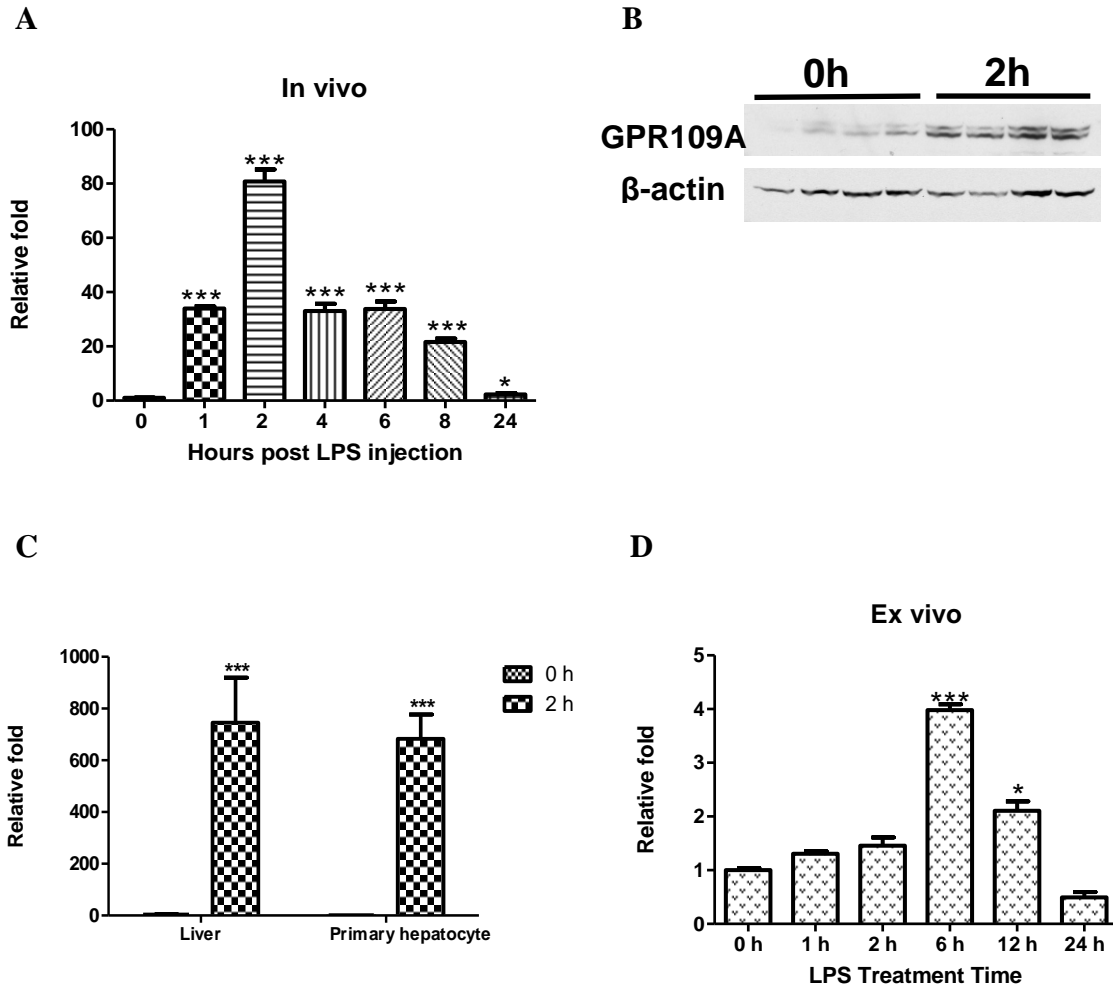

Supplement: NIHMS232508-supplement-01.pdf [file NIHMS232508-supplement-01.pdf]
